# Supplementary material for: DNAmFitAge: biological age indicator incorporating physical fitness
Source: publisher site journal article supplement (doi:10.18632/aging.204538), 2023-02-22
Supplement: Supplementary file [file aging-v15i10-204538-supplementary-material-SD3.pdf]

**SUPPLEMENTARY TABLES**

**Supplementary Table 1. Validation dataset null model pearson correlation and DNAm biomarker significance.**

| DNAm Biomarker | Sex     | Age in Model | LBC1921            |              | LBC1936            |              | CALERIE |              | InChianti |              | WHI    |              | Meta Analysis p-value |
|----------------|---------|--------------|--------------------|--------------|--------------------|--------------|---------|--------------|-----------|--------------|--------|--------------|-----------------------|
|                |         |              | Null R             | DNAm p-value | Null R             | DNAm p-value | Null R  | DNAm p-value | Null R    | DNAm p-value | Null R | DNAm p-value |                       |
| Gaitspeed      | Females | Y            | 0.412              | 0.437        | 0.382              | 0.118        | 0.100*  | 0.519        | 0.478+    | 0.011        | 0.107+ | 1.7E-05      | 0.082                 |
|                |         | N            |                    | 0.069        |                    | 0.230        |         | 0.736        |           | 0.427        |        | 0.0002       | 0.051                 |
|                | Males   | Y            | 0.418              | 0.092        | 0.413              | 0.118        | 0.264*  | 0.519        | 0.334+    | 0.011        |        |              | 0.0048                |
|                |         | N            |                    | 0.011        |                    | 0.230        |         | 0.736        |           | 0.427        |        |              | 0.0037                |
| Gripmax        | Females | Y            |                    | 0.556        |                    | 7.7E-05      |         | 0.258        |           |              | 0.128+ | 0.012        | 0.056                 |
|                |         | N            | 0.422              | 0.0014       | 0.114              | 0.028        | 0.170   | 0.312        |           |              |        | 0.430        | 0.056                 |
|                | Males   | Y            |                    | 0.026        |                    | 0.034        |         | 0.095        |           |              |        |              | 0.702                 |
|                |         | N            | 0.363              | 0.0037       | 0.203              | 0.005        | 0.115   | 0.939        |           |              |        |              | 0.0015                |
| FEV1           | Females | Y            | 0.163 <sup>^</sup> | 0.0017       | 0.214 <sup>^</sup> | 0.0061       | 0.193   | 4.3E-05      |           |              |        |              | 1.99E-04              |
|                | Males   | Y            | 0.196 <sup>^</sup> | 0.0001       | 0.206 <sup>^</sup> | 9.2E-09      | 0.483   | 0.655        |           |              |        |              | 2.01E-09              |
| VO2max         | Overall | Y            | 0.623 <sup>^</sup> | 0.0065       | 0.606 <sup>^</sup> | 0.809        | 0.706   | 0.00013      |           |              |        |              | -                     |

\*Composite Leg Strength, +Physical Functioning, ^FEV

**Supplementary Table 2. DNAmFitAge to chronological age performance in validation datasets.**

|               |                           | Females | Males | Male model in females | Female model in males |
|---------------|---------------------------|---------|-------|-----------------------|-----------------------|
| Training Data | Median Absolute Deviation | 2.7     | 3.0   | 11.9                  | 13.5                  |
|               | Mean Deviation            | 0.0     | 0.0   | -12.2                 | 13.1                  |
|               | R                         | 0.923   | 0.925 | 0.925                 | 0.922                 |
| LBC1921       | Median Absolute Deviation | 3.7     | 4.8   | 11.0                  | 14.5                  |
|               | Mean Deviation            | 0.8     | 1.1   | -11.1                 | 13.8                  |
|               | R                         | 0.409   | 0.386 | 0.404                 | 0.391                 |
| LBC1936       | Median Absolute Deviation | 3.2     | 3.4   | 11.6                  | 13.3                  |
|               | Mean Deviation            | 0.0     | 0.2   | -11.9                 | 12.9                  |
|               | R                         | 0.635   | 0.635 | 0.647                 | 0.624                 |
| CALERIE       | Median Absolute Deviation | 4.9     | 2.3   | 17.1                  | 11.0                  |
|               | Mean Deviation            | -5.0    | -2.0  | -17.1                 | 11.0                  |
|               | R                         | 0.926   | 0.915 | 0.928                 | 0.912                 |
| InChianti     | Median Absolute Deviation | 3.9     | 3.9   | 16.0                  | 9.6                   |
|               | Mean Deviation            | -3.8    | -4.3  | -16.1                 | 9.1                   |
|               | R                         | 0.969   | 0.964 | 0.969                 | 0.963                 |
| JHS           | Median Absolute Deviation | 2.9     | 3.4   | 13.6                  | 9.2                   |
|               | Mean Deviation            | -1.6    | -2.8  | -13.9                 | 8.6                   |
|               | R                         | 0.937   | 0.917 | 0.940                 | 0.914                 |
| WHI           | Median Absolute Deviation | 3.8     |       | 16.8                  |                       |
|               | Mean Deviation            | -3.4    |       | -16.8                 |                       |
|               | R                         | 0.808   |       | 0.812                 |                       |

**Supplementary Table 3. FitAgeAcceleration association to phenotypic outcomes.**

| Meta analysis <i>p</i> -values |                  | Time to death*      | Time to coronary heart disease* | Type 2 diabetes    | Number of comorbidities | Disease free status | Total cholesterol  | Age at menopause   | Any cancer       | hypertension       |
|--------------------------------|------------------|---------------------|---------------------------------|--------------------|-------------------------|---------------------|--------------------|--------------------|------------------|--------------------|
|                                |                  | <i>p</i> = 7.2 E-51 | <i>p</i> = 2.6 E-8              | <i>p</i> = 2.7 E-9 | <i>p</i> = 9.0 E-9      | <i>p</i> = 1.1 E-7  | <i>p</i> = 0.00048 | <i>p</i> = 6.6 E-9 | <i>p</i> = 0.157 | <i>p</i> = 8.7 E-5 |
| LBC1921<br>Females             | Coefficients     | 1.03                |                                 | 0.042              | 0.007                   | 0.009               | -0.039             |                    |                  |                    |
|                                | <i>p</i> -values | 0.013               |                                 | 0.230              | 0.171                   | 0.922               | 0.0017             |                    |                  |                    |
|                                | No. of events    | 375                 |                                 | 16                 | 96                      | 266                 | -                  |                    |                  |                    |
| LBC1921<br>Males               | Coefficients     | 1.06                |                                 | 0.033              | 0.007                   | -0.027              | -0.027             |                    |                  |                    |
|                                | <i>p</i> -values | 1.62E-06            |                                 | 0.392              | 0.273                   | 0.161               | 0.029              |                    |                  |                    |
|                                | No. of events    | 277                 |                                 | 21                 | 102                     | 157                 | -                  |                    |                  |                    |
| LBC1936<br>Females             | Coefficients     | 1.08                |                                 | 0.046              | 0.008                   | -0.006              | -0.010             | -0.081             |                  |                    |
|                                | <i>p</i> -values | 3.76E-08            |                                 | 0.0015             | 0.153                   | 0.672               | 0.112              | 0.043              |                  |                    |
|                                | No. of events    | 334                 |                                 | 109                | 1171                    | 179                 | -                  | -                  |                  |                    |
| LBC1936<br>Males               | Coefficients     | 1.09                |                                 | 0.048              | 0.017                   | -0.038              | -0.011             |                    |                  |                    |
|                                | <i>p</i> -values | 9.24E-12            |                                 | 0.0032             | 0.0031                  | 0.0048              | 0.045              |                    |                  |                    |
|                                | No. of events    | 499                 |                                 | 183                | 1219                    | 211                 | -                  |                    |                  |                    |
| InChianti<br>Females           | Coefficients     | 1.06                |                                 | 0.018              | -0.002                  | -0.006              | -0.046             | -2.96              | -0.059           | 0.0037             |
|                                | <i>p</i> -values | 0.011               |                                 | 0.635              | 0.842                   | 0.868               | 0.223              | 0.00034            | 0.176            | 0.881              |
|                                | No. of events    | 167                 |                                 | 33                 | 235                     | 104                 | -                  | -                  | 37               | 140                |
| InChianti<br>Males             | Coefficients     | 1.07                |                                 | -0.070             | 2.11E-05                | -0.045              | -0.004             |                    | 0.045            | 0.026              |
|                                | <i>p</i> -values | 1.01E-06            |                                 | 0.135              | 0.998                   | 0.215               | 0.905              |                    | 0.292            | 0.219              |
|                                | No. of events    | 162                 |                                 | 33                 | 221                     | 87                  | -                  |                    | 31               | 143                |
| WHI                            | Coefficients     | 1.05                | 1.04                            | 0.050              | 0.021                   | -0.031              | -0.008             | -0.060             | 0.025            | 0.024              |
|                                | <i>p</i> -values | 8.06E-09            | 1.20E-05                        | 0.00052            | 0.0011                  | 0.0041              | 0.570              | 3.82E-05           | 0.063            | 0.014              |
|                                | No. of events    | 771                 | 2117                            | 392                | 1539                    | 793                 | -                  | -                  | 388              | 918                |
| JHS<br>Females                 | Coefficients     | 1.15                | 1.13                            | 0.054              | 0.029                   | -0.062              | -0.116             | 0.747**            |                  | 0.057              |
|                                | <i>p</i> -values | 1.96E-15            | 0.00025                         | 0.0016             | 4.12E-07                | 0.00024             | 0.696              | 0.152              |                  | 0.00071            |
|                                | No. of events    | 156                 | 1001                            | 267                | 721                     | 352                 | -                  | -                  |                  | 664                |
| JHS Males                      | Coefficients     | 1.06                | 1.06                            | 0.012              | 0.012                   | -0.034              | -1.148             |                    |                  | 0.021              |
|                                | <i>p</i> -values | 9.25E-07            | 0.041                           | 0.495              | 0.066                   | 0.082               | 0.0006             |                    |                  | 0.232              |
|                                | No. of events    | 125                 | 579                             | 135                | 406                     | 226                 | -                  |                    |                  | 363                |

\*Hazard Ratios; \*\*Not age at menopause, menopause status; number of events for comorbidities is people with at least 1 comorbidity.

**Supplementary Table 4. Comparing DNAmFitAge importance with other DNAm biomarkers for time-to-death and number of comorbidities after controlling for age and sex.**

| Time-to-Death Model Comparison                                |         | LBC1921 |                     | LBC1936 |                     | InChianti |                     | WHI  |                     | JHS  |                     |
|---------------------------------------------------------------|---------|---------|---------------------|---------|---------------------|-----------|---------------------|------|---------------------|------|---------------------|
|                                                               |         | LRT     | LRT <i>p</i> -value | LRT     | LRT <i>p</i> -value | LRT       | LRT <i>p</i> -value | LRT  | LRT <i>p</i> -value | LR T | LRT <i>p</i> -value |
| DNAmGrimAge + DNAmFitAge to DNAmGrimAge                       | Females | 0.5     | 0.479               | 2.9     | 0.091               | 7.2       | 0.007               | 1.1  | 0.286               | 4.6  | 0.032               |
|                                                               | Males   | 3.7     | 0.054               | 2.6     | 0.110               | 7.7       | 0.005               |      |                     | 0.2  | 0.628               |
| DNAmPhenoAge + DNAmFitAge to DNAmPhenoAge                     | Females | 9.1     | 0.003               | 36.0    | 1.98E-09            | 1.2       | 0.269               | 17.0 | 3.70E-05            | 30.4 | 3.53E-08            |
|                                                               | Males   | 11.3    | 7.64E-04            | 91.0    | < 1.0E-16           | 26.4      | 2.76E-07            |      |                     | 4.3  | 0.039               |
| DNAmPAI1 + DNAmFitAge to DNAmPAI1                             | Females | 9.8     | 0.002               | 51.1    | 8.67E-13            | 7.3       | 0.007               | 17.0 | 3.76E-05            | 38.5 | 5.36E-10            |
|                                                               | Males   | 30.4    | 3.49E-08            | 83.6    | < 1.0E-16           | 22.9      | 1.67E-06            |      |                     | 7.1  | 0.008               |
| DNAmGDF15 + DNAmFitAge to DNAmGDF15                           | Females | 5.2     | 0.023               | 44.8    | 2.16E-11            | 6.1       | 0.014               | 23.1 | 1.54E-06            | 46.6 | 8.88E-12            |
|                                                               | Males   | 25.0    | 5.78E-07            | 70.7    | < 1.0E-16           | 14.1      | 1.73E-04            |      |                     | 4.4  | 3.66E-02            |
| DNAmAgeHannum + DNAmFitAge to DNAmAgeHannum                   | Females | 13.2    | 2.79E-04            | 60.8    | 6.11E-15            | 2.0       | 0.157               | 31.5 | 1.95E-08            | 41.6 | 1.11E-10            |
|                                                               | Males   | 15.0    | 1.09E-04            | 104.0   | < 1.0E-16           | 22.0      | 2.70E-06            |      |                     | 7.0  | 0.008               |
| DNAmAgeSkinBlood Clock + DNAmFitAge to DNAmAgeSkinBlood Clock | Females | 16.4    | 5.05E-05            | 92.3    | < 1.0E-16           | 3.6       | 0.058               | 34.7 | 3.79E-09            | 57.2 | 3.89E-14            |
|                                                               | Males   | 22.4    | 2.17E-06            | 133.8   | < 1.0E-16           | 21.8      | 3.01E-06            |      |                     | 10.9 | 9.46E-04            |
| Number of Comorbidities Model Comparison                      |         |         |                     |         |                     |           |                     |      |                     |      |                     |
| DNAmGrimAge + DNAmFitAge to DNAmGrimAge                       | Females | 2.1     | 0.148               | 1.2     | 0.269               | 0.4       | 0.513               | 3.4  | 0.065               | 0.0  | 0.910               |
|                                                               | Males   | 2.5     | 0.117               | 3.1     | 0.080               | 0.05      | 0.828               |      |                     | 1.2  | 0.267               |
| DNAmPhenoAge + DNAmFitAge to DNAmPhenoAge                     | Females | 0.05    | 0.828               | 2.6     | 0.110               | 3.4       | 0.067               | 2.9  | 0.091               | 8.6  | 0.003               |
|                                                               | Males   | 5.2     | 0.023               | 38.7    | 4.98E-10            | 0.01      | 0.927               |      |                     | 0.7  | 0.412               |
| DNAmPAI1 + DNAmFitAge to DNAmPAI1                             | Females | 0.7     | 0.401               | 1.3     | 0.255               | 0.9       | 0.344               | 1.4  | 0.230               | 2.7  | 0.101               |
|                                                               | Males   | 1.4     | 0.233               | 26.5    | 2.70E-07            | 0.1       | 0.800               |      |                     | 0.1  | 0.817               |
| DNAmGDF15 + DNAmFitAge to DNAmGDF15                           | Females | 0.5     | 0.476               | 5.3     | 0.021               | 0.01      | 0.944               | 6.7  | 0.010               | 22.1 | 2.61E-06            |
|                                                               | Males   | 2.6     | 0.105               | 31.6    | 1.86E-08            | 0.6       | 0.453               |      |                     | 4.2  | 0.041               |
| DNAmAgeHannum + DNAmFitAge to DNAmAgeHannum                   | Females | 0.03    | 0.871               | 2.4     | 0.123               | 0.7       | 0.411               | 6.5  | 0.011               | 13.1 | 2.88E-04            |
|                                                               | Males   | 2.6     | 0.108               | 39.2    | 3.78E-10            | 0.2       | 0.624               |      |                     | 1.1  | 0.305               |
| DNAmAgeSkinBlood Clock + DNAmFitAge to DNAmAgeSkinBlood Clock | Females | 0.3     | 0.596               | 5.6     | 0.018               | 0.2       | 0.682               | 8.3  | 0.004               | 16.5 | 4.83E-05            |
|                                                               | Males   | 1.3     | 0.256               | 55.0    | 1.21E-13            | 0.2       | 0.676               |      |                     | 2.9  | 0.089               |

**Supplementary Table 5. Linear models evaluating dietary supplement usage to DNAmFitAge and DNAmVO2max in males after adjusting for age.**

| Supplement in model |                 | Outcome: DNAmFitAge |             | Outcome: DNAmVO2max |             |
|---------------------|-----------------|---------------------|-------------|---------------------|-------------|
|                     |                 | Supplement          | BodyBuilder | Supplement          | BodyBuilder |
| Multivitamins       | coefficient     | -0.32               | -0.62       | 0.68                | 0.07        |
|                     | <i>p</i> -value | 0.690               | 0.208       | 0.041               | 0.746       |
| Proteins            | coefficient     | -0.05               | -0.65       | 0.45                | 0.10        |
|                     | <i>p</i> -value | 0.961               | 0.184       | 0.241               | 0.607       |
| Energy              | coefficient     | 0.16                | -0.66       | 0.24                | 0.13        |
|                     | <i>p</i> -value | 0.852               | 0.175       | 0.518               | 0.513       |
| Magnesium           | coefficient     | -1.03               | -0.60       | -0.12               | 0.15        |
|                     | <i>p</i> -value | 0.213               | 0.219       | 0.727               | 0.472       |
| Vitamin D           | coefficient     | -0.56               | -0.62       | -0.32               | 0.16        |
|                     | <i>p</i> -value | 0.570               | 0.207       | 0.439               | 0.431       |
| Omega-3             | coefficient     | -1.23               | -0.46       | 0.33                | 0.08        |
|                     | <i>p</i> -value | 0.157               | 0.366       | 0.355               | 0.687       |

**Supplementary Table 6. Dietary supplement use by male athlete status.**

|               |     | Control | Body builder | Fisher's exact <i>p</i> -value |
|---------------|-----|---------|--------------|--------------------------------|
| Multivitamins | No  | 141     | 55           | 0.016                          |
|               | Yes | 8       | 11           |                                |
| Proteins      | No  | 140     | 58           | 0.169                          |
|               | Yes | 9       | 8            |                                |
| Energy        | No  | 145     | 53           | 6.81E-05                       |
|               | Yes | 4       | 13           |                                |
| Magnesium     | No  | 140     | 59           | 0.265                          |
|               | Yes | 9       | 7            |                                |
| Vitamin D     | No  | 143     | 58           | 0.036                          |
|               | Yes | 6       | 8            |                                |
| Omega-3       | No  | 144     | 59           | 0.050                          |

**Supplementary Table 7. Complete GREAT analysis CpG annotation.**

| <b>Genes</b>                                                         | <b>Observed<br/>Regions</b> | <b>Fold<br/>Enrichment</b> | <b>Binomial<br/><i>p</i>-value</b> | <b>Bonferroni<br/><i>p</i>-value</b> | <b>FDR<br/>Q-value</b> |
|----------------------------------------------------------------------|-----------------------------|----------------------------|------------------------------------|--------------------------------------|------------------------|
| ZNRD1                                                                | 4                           | 77.9                       | 2.8E-07                            | 0.0051                               | 0.0051                 |
| HLA-G                                                                | 4                           | 55.0                       | 1.1E-06                            | 0.020                                | 0.010                  |
| KCNS1                                                                | 3                           | 93.3                       | 5.4E-06                            | 0.100                                | 0.033                  |
| HOXA2                                                                | 2                           | 518.0                      | 7.4E-06                            | 0.138                                | 0.034                  |
| TAP2                                                                 | 2                           | 421.0                      | 1.1E-05                            | 0.208                                | 0.042                  |
| <b>Cellular</b>                                                      |                             |                            |                                    |                                      |                        |
| MHC protein complex                                                  | 9                           | 25.1                       | 1.9E-10                            | 3.1E-07                              | 3.1E-07                |
| integral component of endoplasmic reticulum membrane                 | 21                          | 3.7                        | 4.5E-07                            | 7.5E-04                              | 3.7E-04                |
| intrinsic component of endoplasmic reticulum membrane                | 21                          | 3.6                        | 6.4E-07                            | 0.0011                               | 3.5E-04                |
| MHC class II protein complex                                         | 5                           | 26.9                       | 1.6E-06                            | 0.0026                               | 6.5E-04                |
| integral component of lumenal side of endoplasmic reticulum membrane | 7                           | 12.7                       | 1.8E-06                            | 0.0030                               | 6.0E-04                |
| MHC class I protein complex                                          | 4                           | 23.1                       | 3.2E-05                            | 0.054                                | 0.0089                 |
| TAP complex                                                          | 2                           | 195.9                      | 5.2E-05                            | 0.086                                | 0.012                  |
| DNA-directed RNA polymerase I complex                                | 5                           | 12.2                       | 6.7E-05                            | 0.112                                | 0.014                  |
| MHC class I peptide loading complex                                  | 2                           | 169.4                      | 6.9E-05                            | 0.115                                | 0.013                  |
| A band                                                               | 10                          | 4.2                        | 1.7E-04                            | 0.286                                | 0.029                  |
| lysosomal membrane                                                   | 30                          | 2.0                        | 2.9E-04                            | 0.479                                | 0.044                  |
| <b>Molecular</b>                                                     |                             |                            |                                    |                                      |                        |
| peptide antigen binding                                              | 6                           | 13.3                       | 7.7E-06                            | 0.032                                | 0.032                  |
| tapasin binding                                                      | 2                           | 421.0                      | 1.1E-05                            | 0.047                                | 0.023                  |
| MHC class II receptor activity                                       | 4                           | 28.5                       | 1.4E-05                            | 0.060                                | 0.020                  |
| antigen binding                                                      | 11                          | 4.8                        | 2.8E-05                            | 0.116                                | 0.029                  |
| peptide antigen-transporting ATPase activity                         | 2                           | 249.6                      | 3.2E-05                            | 0.133                                | 0.027                  |
| DNA-directed 5'-3' RNA polymerase activity                           | 8                           | 6.7                        | 3.5E-05                            | 0.148                                | 0.025                  |
| 5'-3' RNA polymerase activity                                        | 8                           | 6.5                        | 4.4E-05                            | 0.185                                | 0.026                  |

**Supplementary Table 8. DNAm fitness CpG loci overlap with other epigenetic clocks.**

|    | CpG             | DNAm<br>Fitness<br>Coefficient | Clocks<br>Present<br>in | Same<br>Coefficient<br>Direction | PhenoAge    | DNAmAge     | Hannum      | Skin and<br>Blood | DNAm Fitness Model           |
|----|-----------------|--------------------------------|-------------------------|----------------------------------|-------------|-------------|-------------|-------------------|------------------------------|
|    |                 |                                |                         |                                  | Coefficient | Coefficient | Coefficient | Coefficient       |                              |
|    |                 |                                |                         |                                  | (n = 7)     | (n = 2)     | (n = 15)    | (n = 23)          |                              |
| 1  | cg26842024      | -0.16                          | 3                       | 0                                | 0.06        | 0.36        |             | 0.48              | DNAmGaitspeed Males no Age   |
| 2  | cg00748589      | -0.37                          | 2                       | 0                                |             |             | 8.21        | 0.17              | DNAmGaitspeed Males no Age   |
| 3  | cg02867102      | 0.32                           | 2                       | 0                                |             |             | -12.50      | -0.12             | DNAmGaitspeed Males no Age   |
| 4  | cg03607117      | -0.63                          | 2                       | 0                                |             |             | 10.70       | 0.17              | DNAmGaitspeed Females no Age |
|    |                 | -6.47                          |                         | 0                                |             |             | 10.70       | 0.17              | DNAmGripmax Females no Age   |
| 5  | cg04424621      | 0.01                           | 2                       | 1                                | -14.45      |             |             | 0.04              | DNAmGaitspeed Males no Age   |
| 6  | cg04875128      | -4.72                          | 2                       | 1                                |             |             | -4.37       | 0.0004            | DNAmGripmax Males no Age     |
| 7  | cg06639320      | -8.60                          | 2                       | 0                                |             |             | 8.95        | 0.02              | DNAmGripmax Males no Age     |
| 8  | cg07082267      | 0.22                           | 2                       | 1                                |             |             | 2.87        | -0.47             | DNAmGaitspeed Males no Age   |
| 9  | cg10917602      | 0.02                           | 2                       | 0                                | -2.82       |             |             | -0.02             | DNAmGaitspeed Females w/ Age |
| 10 | cg16419235      | -0.23                          | 2                       | 1                                |             |             | -1.60       | 0.11              | DNAmGaitspeed Females no Age |
|    |                 | -3.81                          |                         | 1                                |             |             | -1.60       | 0.11              | DNAmGripmax Females no Age   |
|    |                 | -0.21                          |                         | 0                                |             |             | 10.80       | 0.90              | DNAmGaitspeed Males no Age   |
|    |                 | -1.26                          |                         | 0                                |             |             | 10.80       | 0.90              | DNAmGaitspeed Females no Age |
| 11 | cg16867657      | -8.32                          | 2                       | 0                                |             |             | 10.80       | 0.90              | DNAmGripmax Males no Age     |
|    |                 | -12.72                         |                         | 0                                |             |             | 10.80       | 0.90              | DNAmGripmax Females no Age   |
| 12 | cg20822990      | 1.53                           | 2                       | 0                                |             |             | -15.70      | -0.01             | DNAmGripmax Males no Age     |
| 13 | cg22454769      | -0.17                          | 2                       | 0                                |             |             | 4.85        | 0.05              | DNAmGaitspeed Males no Age   |
| 14 | cg23500537      | -0.22                          | 2                       | 0                                |             |             | 5.67        | 0.23              | DNAmGripmax Males no Age     |
| 15 | cg25410668      | -1.90                          | 2                       | 0                                |             |             | 3.87        | 0.28              | DNAmGripmax Males no Age     |
| 16 | cg26581729      | 4.08                           | 2                       | 1                                | -4.00       |             |             | 0.02              | DNAmGripmax Males no Age     |
| 17 | cg00481951      | -0.52                          | 1                       | 1                                |             |             | -2.72       |                   | DNAmGaitspeed Males no Age   |
| 18 | cg05228408      | 0.05                           | 1                       | 0                                | -4.49       |             |             |                   | DNAmGaitspeed Females w/ Age |
| 19 | cg07502389      | -0.36                          | 1                       | 0                                |             |             |             | 0.32              | DNAmGaitspeed Females no Age |
| 20 | cg08622677      | -4.43                          | 1                       | 0                                |             |             |             | 0.23              | DNAmGripmax Females no Age   |
| 21 | cg12753631      | 0.11                           | 1                       | 0                                |             |             |             | -0.34             | DNAmGaitspeed Males no Age   |
| 22 | cg12864235      | 0.06                           | 1                       | 1                                | 0.66        |             |             |                   | DNAmFEV1 Females w/ Age      |
|    |                 | -4.04                          |                         | 0                                |             |             |             | 0.04              | DNAmGripmax Females no Age   |
| 23 | cg13649056      | -0.43                          | 1                       | 0                                |             |             |             | 0.04              | DNAmGaitspeed Females no Age |
|    |                 | -0.32                          |                         | 1                                |             |             |             | -0.07             | DNAmGaitspeed Females no Age |
| 24 | cg17110586      | -7.53                          | 1                       | 1                                |             |             |             | -0.07             | DNAmGripmax Females no Age   |
|    |                 | -12.20                         |                         | 0                                | 4.54        |             |             |                   | DNAmGripmax Males no Age     |
| 25 | cg18691434      | -0.13                          | 1                       | 0                                | 4.54        |             |             |                   | DNAmGaitspeed Males no Age   |
|    |                 | -3.40                          |                         | 0                                | 4.54        |             |             |                   | DNAmGripmax Males w/ Age     |
| 26 | cg18933331      | 0.06                           | 1                       | 0                                |             |             |             | -0.23             | DNAmGaitspeed Males no Age   |
| 27 | cg19702785      | -0.23                          | 1                       | 0                                |             |             |             | 0.13              | DNAmGaitspeed Males no Age   |
| 28 | cg22285878      | -4.14                          | 1                       | 1                                |             |             | -20.70      |                   | DNAmGripmax Females no Age   |
| 29 | cg25101936      | 0.004                          | 1                       | 0                                |             | -0.06       |             |                   | DNAmGaitspeed Females w/ Age |
| 30 | ch.13.39564907R | 0.30                           | 1                       | 0                                |             |             | -20.60      |                   | DNAmGaitspeed Males no Age   |

**Supplementary Table 9. Descriptive statistics for each dataset.**

| Total               | BLSA        | Budapest    | LBC1921    | LBC1936     | CALERIE    | InChianti   | JHS         | WHI         | Polish     |
|---------------------|-------------|-------------|------------|-------------|------------|-------------|-------------|-------------|------------|
| <b>Observations</b> | 820         | 307         | 692        | 2797        | 578        | 924         | 1746        | 2117        | 215        |
| Age mean (sd)       | 69.2 (13.6) | 60.3 (11.7) | 82.3 (4.3) | 73.6 (3.7)  | 39.4 (7.2) | 67.0 (16.6) | 56.2 (12.3) | 65.4 (7.1)  | 35.5 (8.8) |
| < 40                | 24 (3%)     | 8 (3%)      | 0 (0%)     | 0 (0%)      | 265 (46%)  | 100 (11%)   | 173 (10%)   | 0 (0%)      | 144 (67%)  |
| 40–59               | 178 (22%)   | 133 (43%)   | 0 (0%)     | 0 (0%)      | 313 (54%)  | 128 (14%)   | 856 (49%)   | 525 (25%)   | 71 (33%)   |
| 60–79               | 400 (49%)   | 151 (50%)   | 410 (59%)  | 2719 (97%)  | 0 (0%)     | 502 (54%)   | 691 (40%)   | 1589 (75%)  | 0 (0%)     |
| 80+                 | 218 (27%)   | 15 (5%)     | 282 (41%)  | 78 (3%)     | 0 (0%)     | 194 (21%)   | 26 (2%)     | 3 (0%)      | 0 (0%)     |
| <b>Sex</b>          |             |             |            |             |            |             |             |             |            |
| Males               | 417 (51%)   | 148 (48%)   | 291 (42%)  | 1141 (52%)  | 178 (31%)  | 426 (46%)   | 649 (37%)   | 0 (0%)      | 215 (100%) |
| Females             | 403 (50%)   | 159 (52%)   | 401 (58%)  | 1356 (49%)  | 400 (69%)  | 498 (54%)   | 1097 (63%)  | 2117 (100%) | 0 (0%)     |
| <b>Race</b>         |             |             |            |             |            |             |             |             |            |
| White               | 572 (70%)   | 297 (97%)   | 692 (100%) | 2797 (100%) | 442 (77%)  | 924 (100%)  | 0 (0%)      | 1007 (48%)  | 215 (100%) |
| Black               | 216 (26%)   | 0 (0%)      | 0 (0%)     | 0 (0%)      | 71 (12%)   | 0 (0%)      | 1746 (100%) | 677 (32%)   | 0 (0%)     |
| Asian               | 24 (3%)     | 10 (3%)     | 0 (0%)     | 0 (0%)      | unknown    | 0 (0%)      | 0 (0%)      | unknown     | 0 (0%)     |
| Other               | 8 (1%)      | 0 (0%)      | 0 (0%)     | 0 (0%)      | 65 (11%)   | 0 (0%)      | 0 (0%)      | 433 (21%)   | 0 (0%)     |

**Supplementary Table 10. Complete chromatin state analysis.**

|    | State    | Number of CpG loci | Odds Ratio | Hypergeometric <i>p</i> -value |    | State    | Number of CpG loci | Odds Ratio | Hypergeometric <i>p</i> -value |
|----|----------|--------------------|------------|--------------------------------|----|----------|--------------------|------------|--------------------------------|
| 1  | PromF4   | 25                 | 0.45       | 6.5E-06                        | 51 | Acet1    | 5                  | 1.43       | 0.277                          |
| 2  | TSS1     | 15                 | 0.37       | 6.8E-06                        | 52 | EnhA1    | 8                  | 1.30       | 0.280                          |
| 3  | BivProm2 | 43                 | 1.76       | 0.00057                        | 53 | EnhA16   | 4                  | 1.49       | 0.286                          |
| 4  | TxEx3    | 4                  | 0.30       | 0.0030                         | 54 | HET9     | 0                  | 0.00       | 0.287                          |
| 5  | DNase1   | 13                 | 2.41       | 0.0041                         | 55 | EnhA12   | 2                  | 0.56       | 0.312                          |
| 6  | ReprPC1  | 21                 | 1.87       | 0.0065                         | 56 | GapArtf2 | 1                  | 2.64       | 0.316                          |
| 7  | BivProm1 | 43                 | 1.50       | 0.0092                         | 57 | znf2     | 2                  | 1.74       | 0.320                          |
| 8  | ReprPC5  | 18                 | 1.87       | 0.011                          | 58 | HET3     | 1                  | 2.47       | 0.334                          |
| 9  | EnhA3    | 9                  | 2.53       | 0.011                          | 59 | Tx2      | 1                  | 0.44       | 0.336                          |
| 10 | TxWk1    | 0                  | 0.00       | 0.014                          | 60 | EnhWk2   | 8                  | 1.22       | 0.338                          |
| 11 | PromF6   | 11                 | 2.13       | 0.018                          | 61 | HET8     | 1                  | 0.44       | 0.338                          |
| 12 | EnhA8    | 11                 | 2.09       | 0.020                          | 62 | TxEx1    | 2                  | 0.59       | 0.342                          |
| 13 | ReprPC7  | 21                 | 1.66       | 0.021                          | 63 | Acet4    | 5                  | 1.29       | 0.346                          |
| 14 | PromF2   | 17                 | 1.70       | 0.028                          | 64 | EnhA14   | 3                  | 0.67       | 0.350                          |
| 15 | BivProm4 | 12                 | 1.82       | 0.039                          | 65 | Quies4   | 3                  | 1.43       | 0.352                          |
| 16 | EnhA18   | 11                 | 1.87       | 0.039                          | 66 | Tx1      | 3                  | 1.40       | 0.364                          |
| 17 | Acet2    | 0                  | 0.00       | 0.042                          | 67 | Acet3    | 3                  | 0.69       | 0.367                          |
| 18 | TxEnh5   | 6                  | 0.49       | 0.044                          | 68 | PromF5   | 25                 | 0.91       | 0.368                          |
| 19 | TxEnh2   | 0                  | 0.00       | 0.047                          | 69 | ReprPC3  | 3                  | 0.69       | 0.374                          |
| 20 | TxEnh8   | 8                  | 2.02       | 0.049                          | 70 | PromF3   | 23                 | 0.91       | 0.380                          |
| 21 | BivProm3 | 20                 | 1.51       | 0.053                          | 71 | TxWk2    | 10                 | 0.86       | 0.382                          |
| 22 | TxEx2    | 4                  | 0.44       | 0.054                          | 72 | EnhA9    | 5                  | 1.23       | 0.386                          |
| 23 | EnhWk8   | 2                  | 0.32       | 0.055                          | 73 | ReprPC9  | 3                  | 1.30       | 0.408                          |

|    |         |    |      |       |     |          |    |      |       |
|----|---------|----|------|-------|-----|----------|----|------|-------|
| 24 | EnhWk6  | 5  | 2.42 | 0.060 | 74  | EnhWk1   | 1  | 0.50 | 0.408 |
| 25 | EnhWk4  | 0  | 0.00 | 0.083 | 75  | EnhA11   | 1  | 0.50 | 0.408 |
| 26 | Tx7     | 0  | 0.00 | 0.086 | 76  | ReprPC4  | 4  | 0.78 | 0.418 |
| 27 | Quies3  | 4  | 0.49 | 0.089 | 77  | Acet6    | 2  | 0.66 | 0.420 |
| 28 | ReprPC6 | 5  | 0.53 | 0.096 | 78  | Acet7    | 4  | 0.78 | 0.420 |
| 29 | Quies2  | 0  | 0.00 | 0.102 | 79  | TSS2     | 23 | 0.93 | 0.422 |
| 30 | TxEnh1  | 0  | 0.00 | 0.106 | 80  | Tx4      | 1  | 0.52 | 0.425 |
| 31 | EnhA4   | 6  | 1.84 | 0.114 | 81  | TxEnh6   | 2  | 0.67 | 0.427 |
| 32 | EnhA2   | 2  | 0.39 | 0.119 | 82  | EnhA17   | 6  | 1.11 | 0.456 |
| 33 | EnhA15  | 5  | 1.86 | 0.136 | 83  | EnhA10   | 3  | 0.78 | 0.464 |
| 34 | TxEx4   | 6  | 1.74 | 0.136 | 84  | PromF7   | 2  | 0.71 | 0.465 |
| 35 | TxEnh7  | 8  | 1.59 | 0.139 | 85  | TxEnh4   | 8  | 1.06 | 0.482 |
| 36 | Tx3     | 6  | 1.72 | 0.142 | 86  | HET7     | 4  | 0.85 | 0.489 |
| 37 | EnhA6   | 1  | 0.30 | 0.150 | 87  | EnhA19   | 6  | 1.03 | 0.529 |
| 38 | HET5    | 0  | 0.00 | 0.185 | 88  | Tx5      | 5  | 1.03 | 0.534 |
| 39 | HET6    | 7  | 1.50 | 0.191 | 89  | Acet8    | 3  | 1.07 | 0.534 |
| 40 | Tx8     | 1  | 0.34 | 0.204 | 90  | HET2     | 10 | 0.96 | 0.538 |
| 41 | Quies1  | 0  | 0.00 | 0.208 | 91  | GapArtf1 | 1  | 0.68 | 0.566 |
| 42 | HET1    | 5  | 1.59 | 0.210 | 92  | ReprPC2  | 5  | 0.96 | 0.579 |
| 43 | EnhWk3  | 2  | 0.48 | 0.215 | 93  | TxEnh3   | 3  | 0.93 | 0.595 |
| 44 | Tx6     | 0  | 0.00 | 0.222 | 94  | EnhA13   | 1  | 0.73 | 0.601 |
| 45 | EnhA7   | 8  | 1.38 | 0.233 | 95  | Quies5   | 1  | 1.03 | 0.623 |
| 46 | Acet5   | 1  | 0.36 | 0.235 | 96  | EnhA20   | 0  | 0.00 | 0.630 |
| 47 | PromF1  | 12 | 1.26 | 0.251 | 97  | znf1     | 1  | 0.79 | 0.638 |
| 48 | EnhA5   | 4  | 1.56 | 0.257 | 98  | ReprPC8  | 1  | 0.85 | 0.672 |
| 49 | EnhWk5  | 3  | 1.68 | 0.266 | 99  | EnhWk7   | 1  | 0.94 | 0.714 |
| 50 | HET4    | 1  | 3.16 | 0.272 | 100 | GapArtf3 | 0  | 0.00 | 0.720 |
